# Supplementary material for: Manganese Detoxification by MntE Is Critical for Resistance to Oxidative Stress and Virulence of Staphylococcus aureus
Source: PubMed Central journal article supplement (PMC6391924; doi:10.1128/mbio.02915-18), 2019-02-26
Supplement: mBio.02915-18-sf001.pdf [file mBio.02915-18-sf001.pdf]

|                                       |        | % Identity                                                     |     |
|---------------------------------------|--------|----------------------------------------------------------------|-----|
| <i>Staphylococcus aureus</i>          | --     | MSHNENLKLQQRGAYLSLVYIIILSIVKYVTGTFVNSAAVRADALNNMTDIIVSLAVI     | 58  |
| <i>Streptococcus pyogenes</i> (41%)   | MTQDP  | IANLKLARKGPVSVIIIVYLSLSVAKLLAGYLLNASSLIADGFNNLSDIVGNVALL       | 60  |
| <i>Streptococcus pneumoniae</i> (80%) | -MKQSI | NLKLAEARGAIIISISTYLLISAACLAAAGHLLHSSSLVADGFNNVSDIIGNVALL       | 59  |
| <i>Streptococcus suis</i> (45%)       | -MNQNV | TNLKLAEARGALLSIGAYIVLSGIKLVAGQLFHSDALRADAFNNISDIIGNIAVL        | 59  |
|                                       |        | ***** * * * * * * * * * * * * *                                |     |
| <i>Staphylococcus aureus</i>          |        | IGLKISIKPADRNHPYGHKLSENISSLLVSVFVIMFVGIQVVIQNAPRLFKEDDVVPAIT   | 118 |
| <i>Streptococcus pyogenes</i>         |        | IGLHLASQPADANKHFGHWKIEDLSSLVTSFIMFLVGFQVLHTIKSIFSGQQVDIDPLG    | 120 |
| <i>Streptococcus pneumoniae</i>       |        | IGIRMARQPADRDHRFGHWKIEDLASLITSIIMFYVGFVLRDITQIKLSREETVIDPLG    | 119 |
| <i>Streptococcus suis</i>             |        | VGLKMAQKPADTDHFKGHWKMEDLASLITSEIMFVVGFDVLYDTLQKLISNSSIEVDIMG   | 119 |
|                                       |        | * ** * * * * * * * * * *                                       |     |
| <i>Staphylococcus aureus</i>          |        | IIVSLISGLVMLIVFAVNQRLAKRTKSSSLNSAAKDNLSDSLVSIQTAIGLIFTQIGFPI   | 178 |
| <i>Streptococcus pyogenes</i>         |        | AIVGIVSAFVMLGVYVFNKRLSKRVKSSALVAASKDNLADAVTSIGTSAIILAASLHLPV   | 180 |
| <i>Streptococcus pneumoniae</i>       |        | ATLGIISAAIMFVVLYNTRLSSKSSNSNALKAAAKDNLSDAVTSLGTAIAIASSFNYP     | 179 |
| <i>Streptococcus suis</i>             |        | AIVGIFSAVLMNAVYLYNNRLAKKVRSKALEAAAKDNLSDAVTSIGTSAIAFAAAFNFPI   | 179 |
|                                       |        | * * * * * * * * * * * * * *                                    |     |
| <i>Staphylococcus aureus</i>          |        | VDIILLATLLGLLIVYTGFGIFKEAIFMLSDGFNETELEAYRNDILEVDEVQEVKSIKGRY  | 238 |
| <i>Streptococcus pyogenes</i>         |        | IDHIAAMIITFFILKTAFDIFMESSFSLSDGFDSRHLKKYEKAILEIPKIVAVKSRQART   | 240 |
| <i>Streptococcus pneumoniae</i>       |        | VDKLVAAIIITFFILKTAYDIFIESSFSLSDGFDDRLLEDYQKAIMIPKISKVKSRGR     | 239 |
| <i>Streptococcus suis</i>             |        | VDKIAAIIITFFILKTAYDIFMESFFTLSDGFENLLKKYEEEDILKLPKIVSVKSRGR     | 239 |
|                                       |        | * * * * * * * * * * * * * *                                    |     |
| <i>Staphylococcus aureus</i>          |        | HGSSVFIDVTIVVDANLSLVEAHQICDNVEHHLHK-KGISSVYVHPEPDHL-----       | 288 |
| <i>Streptococcus pyogenes</i>         |        | YGSNVYLDIVLEMNPDLSVYESHSITEKVEQLLSDQFSIYDIDIHVEPAMIPPEEIFDNV   | 300 |
| <i>Streptococcus pneumoniae</i>       |        | YGSNIYLDITLEMNPDLSVFESHIEIADQVESMLEERFVGFDTDVIHVEPAPIPEDEILDNV | 299 |
| <i>Streptococcus suis</i>             |        | YGANIYLDVVLLEMNPDLSVYESHIEVTEQVEQLLTLKHGVFDVDIHEPSEIPHDEMYEHV  | 299 |
|                                       |        | * * * * * * * * * * * * * *                                    |     |
| <i>Staphylococcus aureus</i>          |        | -----                                                          | 288 |
| <i>Streptococcus pyogenes</i>         |        | AKKLYRYEKLILSKVPDYDHYIAKSFQLIDANGQTVNYEQFLNQEIYPSNFNHFQIESI    | 360 |
| <i>Streptococcus pneumoniae</i>       |        | YKLLMREQ-LDQGNQLEELLTDDFVYIRQDGEQMDKEAYKTKKE-LNSAIKDIQITSI     | 357 |
| <i>Streptococcus suis</i>             |        | YDKLFRFETEIQAHDANGYEELIDDQYLLIDAKGRYRNKTQMLADHPIQTTYLSNYQMTSI  | 359 |
| <i>Staphylococcus aureus</i>          |        | -----                                                          | 288 |
| <i>Streptococcus pyogenes</i>         |        | SQKTMVLVYQLNGNQRTSIWRRHESWLLFHQITPIAKKQLHHTHYRIVKM--           | 411 |
| <i>Streptococcus pneumoniae</i>       |        | SQKTKLICYELDGIHITSIWRRHETWQNIFHQETKKE-----                     | 394 |
| <i>Streptococcus suis</i>             |        | SQKSKLVTFEIGDYVHTSLWRRHENWTVIFHQISKKQASQIEATEKSSDLHNP          | 412 |
