# Supplementary material for: Manganese Detoxification by MntE Is Critical for Resistance to Oxidative Stress and Virulence of Staphylococcus aureus
Source: PubMed Central journal article supplement (PMC6391924; doi:10.1128/mbio.02915-18), 2019-02-26

**A**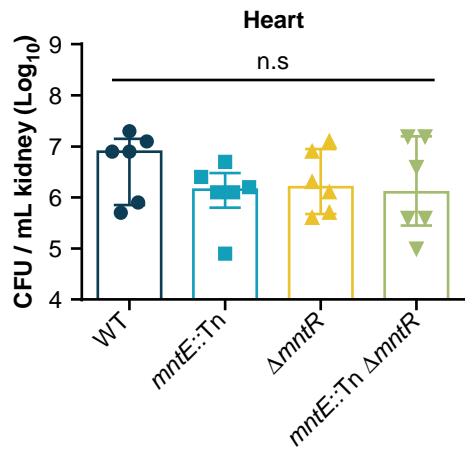**B**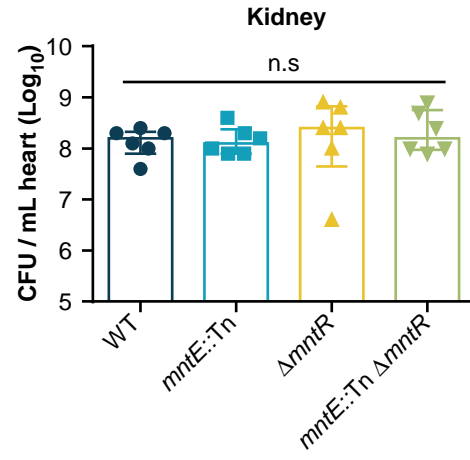

Supplement: mBio.02915-18-sf005.pdf [file mBio.02915-18-sf005.pdf]
